# Supplementary material for: Polymeric di- and discrete trinuclear silver(I) assemblies incorporating γ-carbon bonded, neutral acetylacetone-imine motifs assembled from racemic and diastereopure N,N′-bis(acetylacetone)cyclohexanediimine units
Source: Royal Society of Chemistry journal article supplement (doi:10.1039/b903467f), 2009-01-01
Supplement: b903467f.pdf [file b903467f.pdf]

## Electronic Supplementary Information

**Polymeric di- and discrete trinuclear silver(I) assemblies incorporating  $\gamma$ -carbon bonded neutral acetylacetonimine motifs assembled from racemic and diastereopure *N,N'*-bis(acetylacetonimine)cyclohexanediiimine units**

**Bi-Xue Zhu,<sup>\*a</sup> Qi-Long Zhang,<sup>a</sup> Yun-Qian Zhang,<sup>a</sup> Tao Zhu,<sup>a</sup> Jack K. Clegg,<sup>b</sup> Jeffery R. Reimers,<sup>b</sup> Leonard F. Lindoy<sup>\*b</sup> and Gang Wei<sup>\*c</sup>**

<sup>a</sup> *Key Laboratory of Macrocyclic and Supramolecular Chemistry, Guizhou University, Guizhou 550025, P. R. China*

<sup>b</sup> *School of Chemistry, F11, The University of Sydney, NSW 2006, Australia*

<sup>c</sup> *CSIRO Materials Science and Engineering, P.O. Box 218, Lindfield, NSW 2070, Australia*

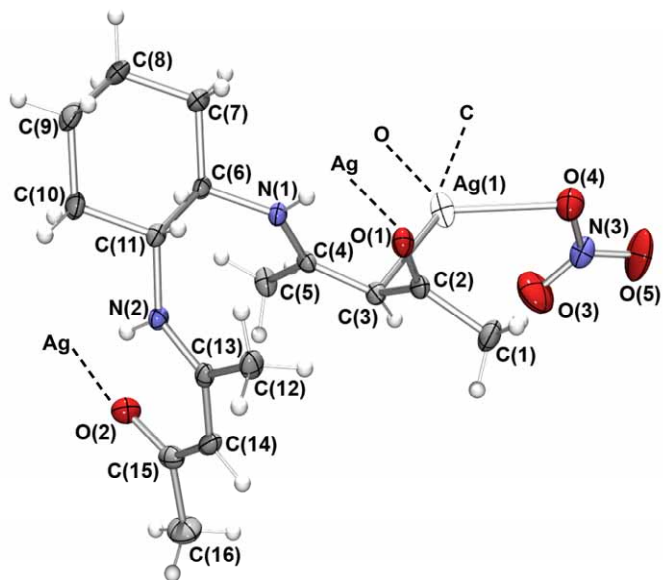

**Fig. 1S.** Structure of  $[\text{Ag}_2(\text{L}^1)(\text{L}^2)(\text{NO}_3)_2]_n$  (**1**), showing the smallest repeating unit

**Table 1S.** Hydrogen Bond Geometry for **2**

| Donor | Hydrogen | Acceptor          | D-H(Å)  | H-A(Å)   | D-A(Å)    | DHA Angle (°) |
|-------|----------|-------------------|---------|----------|-----------|---------------|
| N(1)  | H(1)     | O(1)              | 0.86    | 1.96     | 2.645(4)  | 135.7         |
| N(2)  | H(2)     | O(2)              | 0.86    | 2.02     | 2.674(4)  | 132.5         |
| O(3)  | H(10)    | O(10)             | 0.90(3) | 2.05(5)  | 2.767(10) | 135(6)        |
| O(3)  | H(20)    | O(1) <sup>2</sup> | 0.90(3) | 2.10(4)  | 2.792(5)  | 133(4)        |
| O(6)  | H(30)    | O(2) <sup>1</sup> | 0.89(8) | 2.13(6)  | 2.903(5)  | 143(9)        |
| O(6)  | H(30)    | O(8)              | 0.89(8) | 2.91(10) | 3.007(9)  | 87(6)         |

Symmetry Operators:(1)  $x, y, z$  (2)  $-y, x-y, z$

## Additional views of the structure and crystal packing for 2

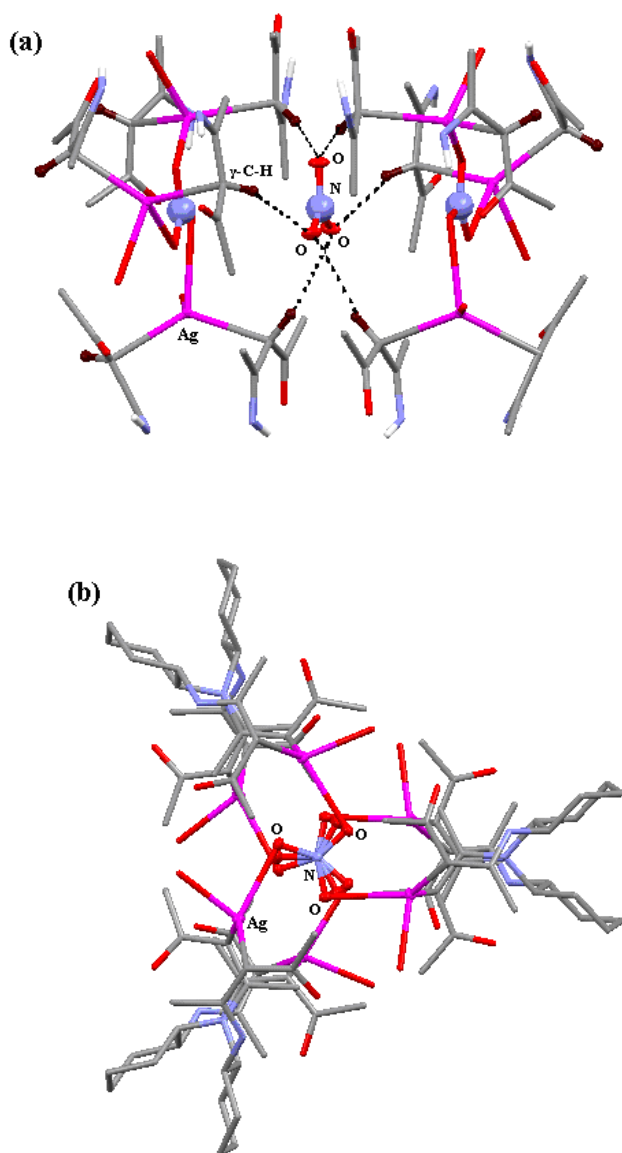

**Fig. 2S.** Further views of the structure of **2**: (a) Molecular structure and 'dimer-forming' hydrogen bonds between two trinuclear complexes. (b) The structure of two molecular packing via the  $\gamma$ -CH...O<sup>ix</sup> hydrogen bonding viewed down the c-axis (ix = -y, x-y, z). H atoms are omitted for clarity.

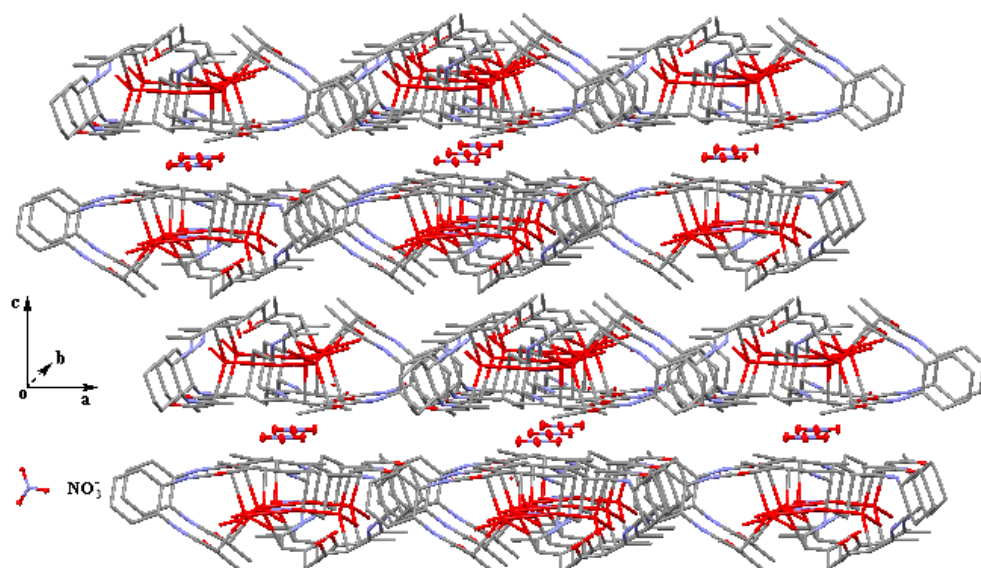

**Fig. 3S.** The layer structure of **7** viewed slightly off the *b* axis. H atoms and H<sub>2</sub>O are omitted for clarity.

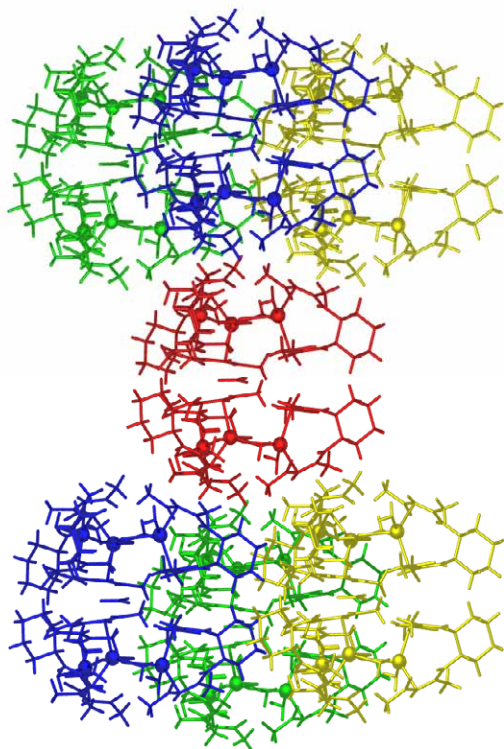

**Fig 4S.** Schematic representation showing the packing of seven  $\{[\text{Ag}_3(\text{L}^1)_3(\text{NO}_3)(\text{H}_2\text{O})_3]_2(\text{NO}_3)\}^{3+}$  cations.
